# Supplementary material for: Gestational diabetes mellitus and later cardiovascular disease: a Swedish population based case–control study
Source: PubMed Central journal article supplement — BJOG. 2014 Apr 25;121(12):1530–6. doi: 10.1111/1471-0528.12754 (PMC4232923; doi:10.1111/1471-0528.12754), 2014-04-25
Supplement: bjo0121-1530-sd1.pdf [file bjo0121-1530-sd1.pdf]

Table S1. Odds ratios (95% confidence interval) for GDM as a risk factor for cardiovascular disease in smoking vs. non-smoking women

|                             |        | <b>Cases</b>  | <b>Controls</b> | <b>Crude</b>     |              | <b>Adjusted*</b> |              |
|-----------------------------|--------|---------------|-----------------|------------------|--------------|------------------|--------------|
|                             |        | <b>N=2639</b> | <b>N=13310</b>  | <b>OR</b>        | <b>p-</b>    | <b>OR</b>        | <b>p-</b>    |
|                             |        | <b>(%)</b>    | <b>(%)</b>      | <b>(95% CI)</b>  | <b>value</b> | <b>(95% CI)</b>  | <b>value</b> |
| <b>Stratified</b>           |        |               |                 |                  |              |                  |              |
| <b>By smoking</b>           |        |               |                 |                  |              |                  |              |
| Smoking<br>(n=3343)         | No GDM | 918 (98.6)    | 2380 (98.7)     | Reference        |              | Reference        |              |
|                             | GDM    | 13 (1.4)      | 32 (1.3)        | 0.86 (0.34-2.19) | 0.755        | 0.48 (0.17-1.36) | 0.167        |
| Non<br>Smoking<br>(n=12606) | No GDM | 1659 (97.1)   | 10782 (98.9)    | Reference        |              | Reference        |              |
|                             | GDM    | 49 (2.9)      | 116 (1.1)       | 3.09 (2.05-4.66) | <0.001       | 2.18 (1.40-3.39) | 0.001        |
| <b>Interaction p-value</b>  |        |               |                 |                  | 0.015        |                  | 0.017        |

\*adjusted for chronic hypertension, parity, education level, ethnicity, BMI
